# Supplementary material
Source: HighWire-hosted journal article supplement (http://jme.bmjjournals.com/highwire/filestream/144712/field_highwire_adjunct_files/0/3411821errartum.pdf)
Supplement: 3411821errartum.pdf [file 3411821errartum.pdf]

## Correction

doi: 10.1136/jme.2008.024877corr1

Camporesi S, Boniolo G. Fearing a non-existing minotaur? The ethical challenges of research on cytoplasmic hybrid embryos. *J Med Ethics* 2008;**34**:821–5. The last paragraph on page 824 was a post-acceptance addition to the paper by the author and as such should have been headed “Note added in proof”.
